# Supplementary material for: A Mendelian randomization study between metabolic syndrome and its components with prostate cancer
Source: PubMed Central journal article supplement (PMC11192917; doi:10.1038/s41598-024-65310-y), 2024-06-21
Supplement: 41598_2024_65310_MOESM1_ESM.pdf [file 41598_2024_65310_MOESM1_ESM.pdf]

## Supplementary Material

# A study of the causal association between metabolic syndrome and its components with prostate cancer: a Mendelian randomization analysis

Long Xia<sup>†</sup>, Xiao-dong Yu<sup>†</sup>, Li Wang<sup>†</sup>, Lin Yang, Er-hao Bao, Ben Wang, Ping-yu Zhu\*

\*Corresponding author: Ping-yu Zhu, Email: [zhupingyu@nsmc.edu.cn](mailto:zhupingyu@nsmc.edu.cn)

### 1. Supplementary Figures

**A:** metabolic syndrome (MetS); **B:** triglycerides(TG); **C:** high density lipoprotein(HDL); **D:** diastolic blood pressure(DBP); **E:** systolic blood pressure (SBP); **F:** fasting blood glucose(FBG); **G:** waist circumference(WC)

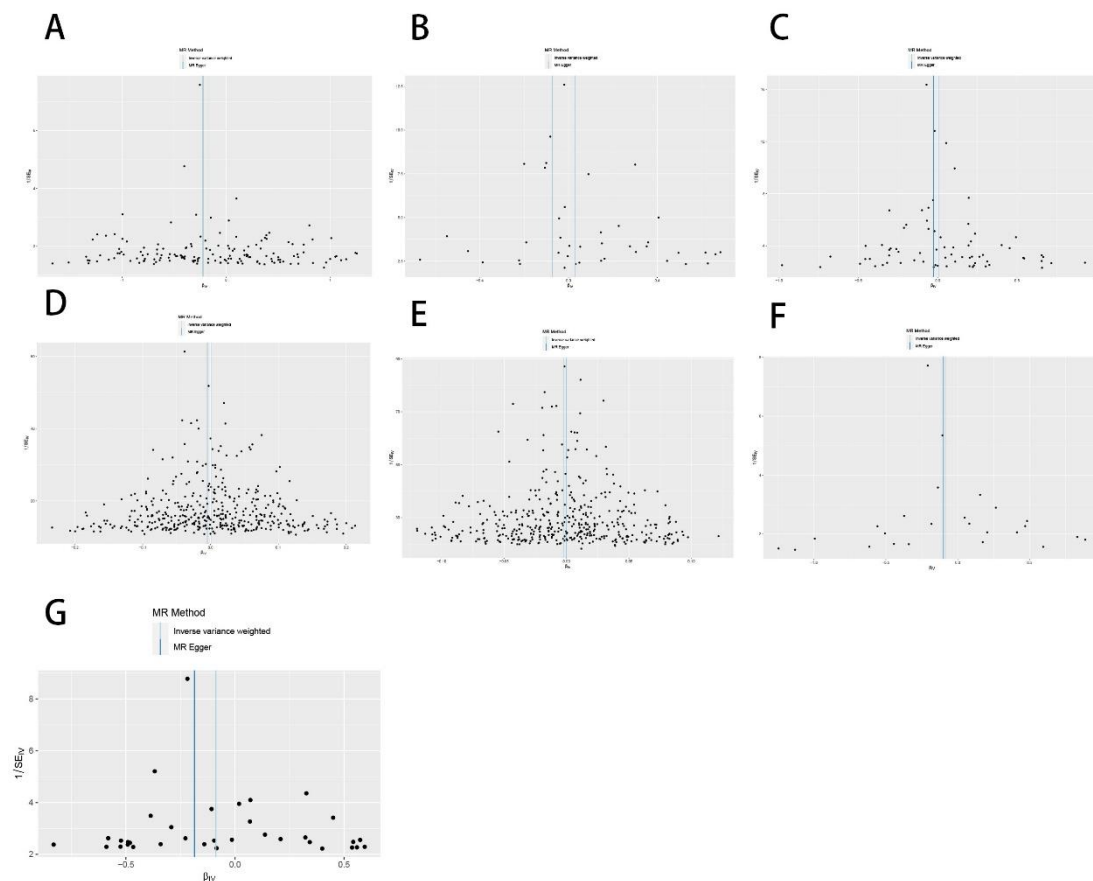

**Supplementary Figure 1. Funnel plot analysis of the metabolic syndrome and its components in relation to prostate cancer (outcome data from the PRACTICAL Consortium)**

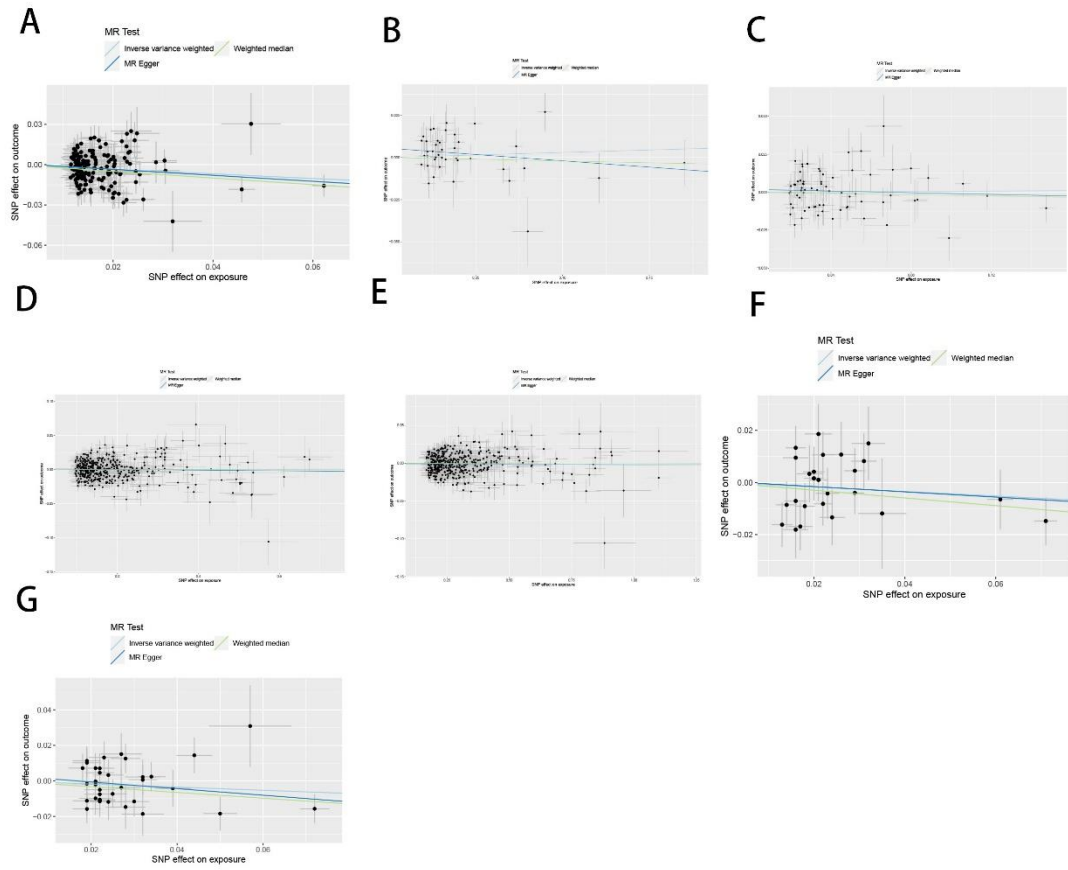

**Supplementary Figure 2. Scatterplot analysis of the metabolic syndrome and its components in relation to prostate cancer (outcome data from the PRACTICAL Consortium)**

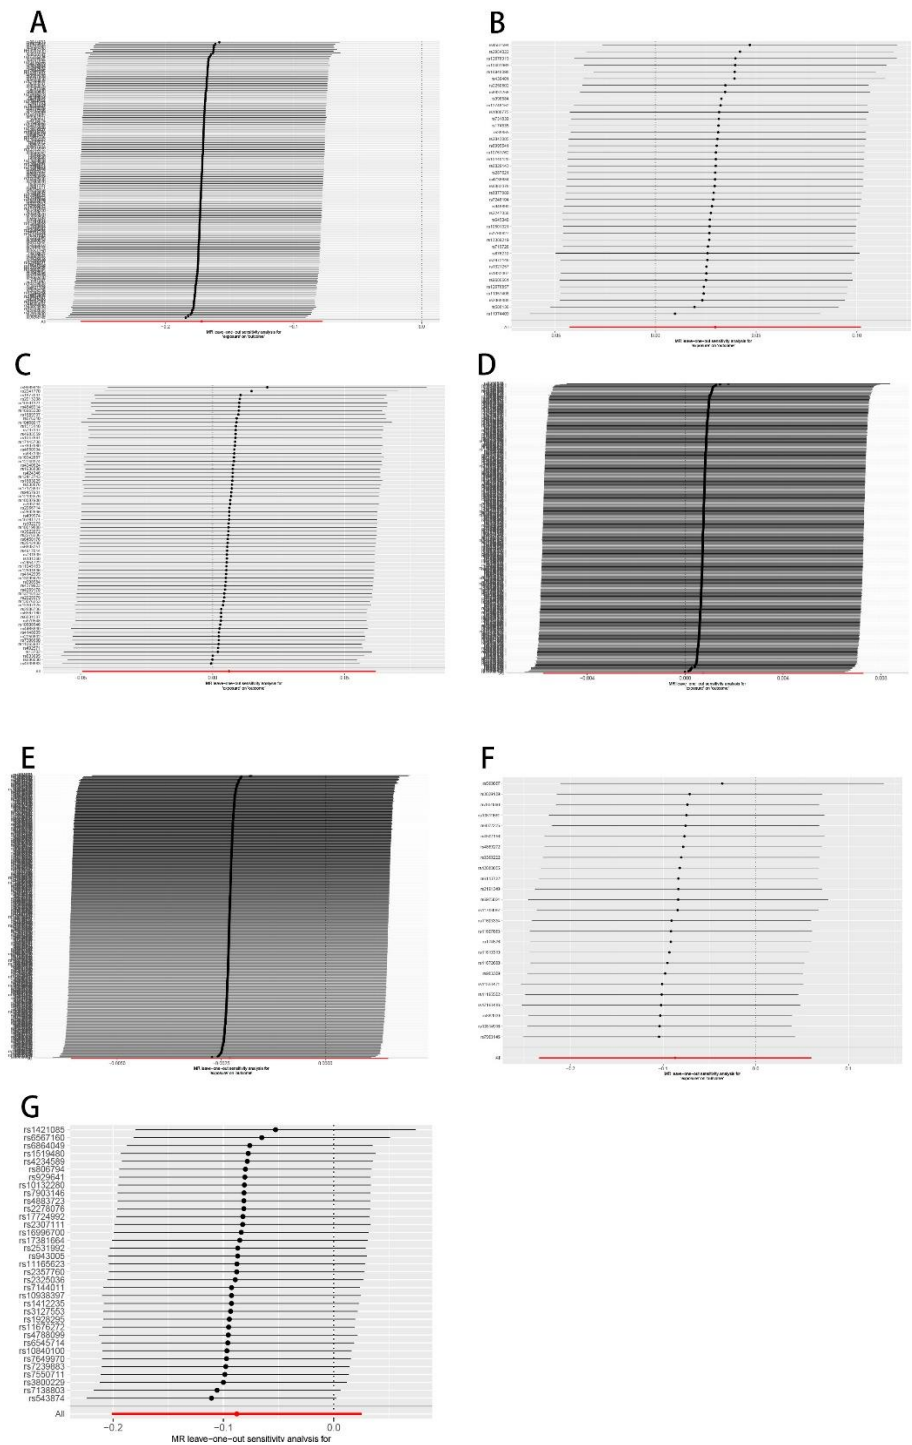

**Supplementary Figure 3. Leave-one-plot analysis of the metabolic syndrome and its components in relation to prostate cancer (outcome data from the PRACTICAL Consortium)**

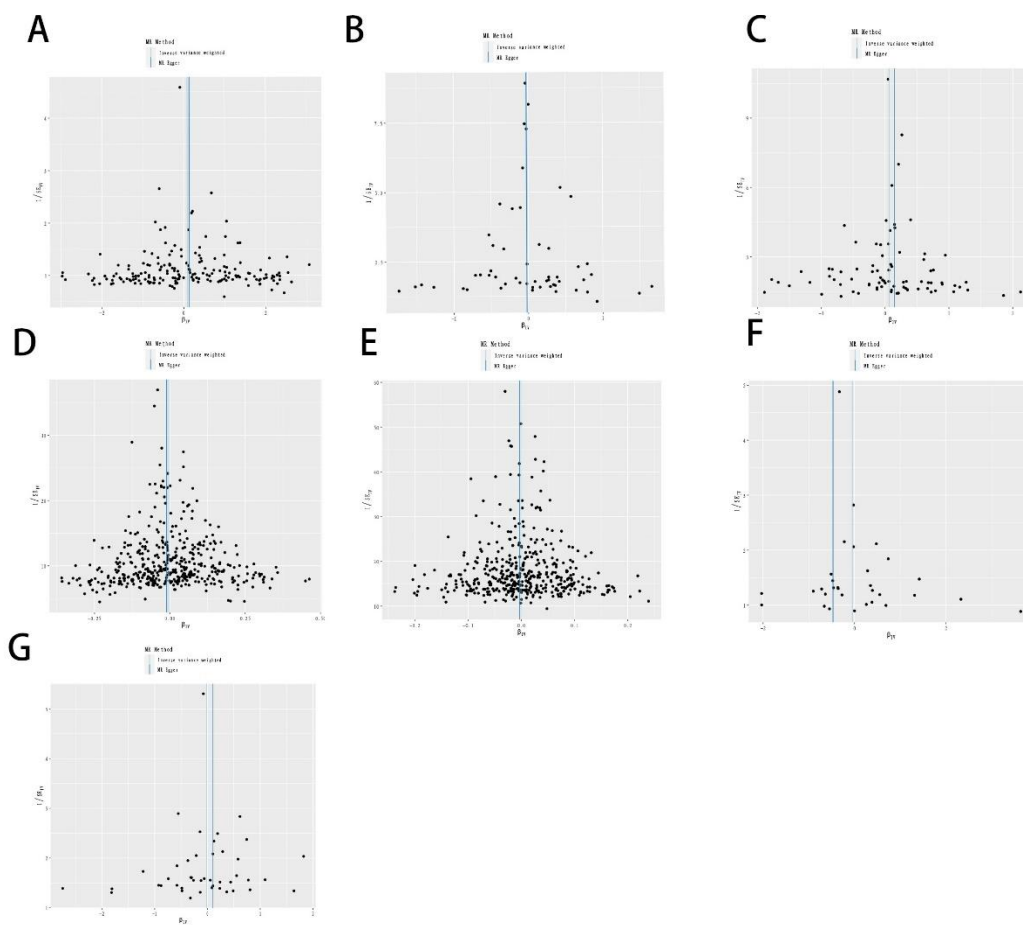

**Supplementary Figure 4. Funnel plot analysis of metabolic syndrome and its components in relation to prostate cancer (outcome data from FinnGen Consortium)**

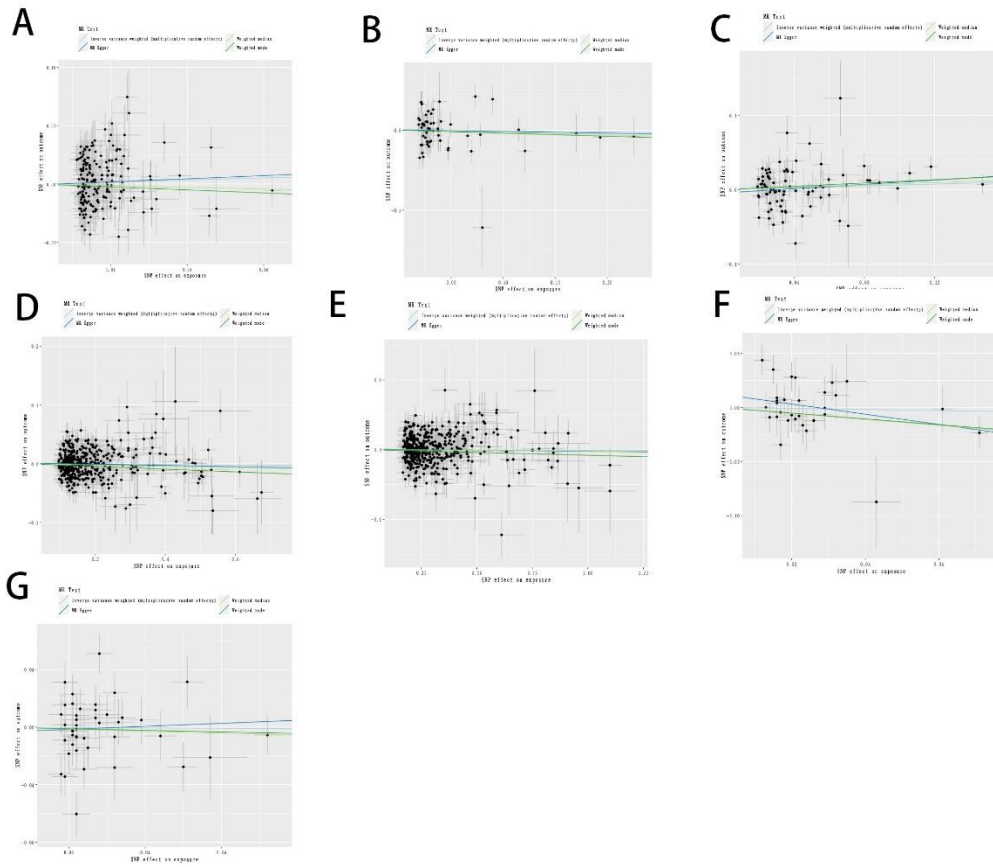

**Supplementary Figure 5. Scatterplot analysis of the metabolic syndrome and its components in relation to prostate cancer (outcome data from the FinnGen Consortium)**

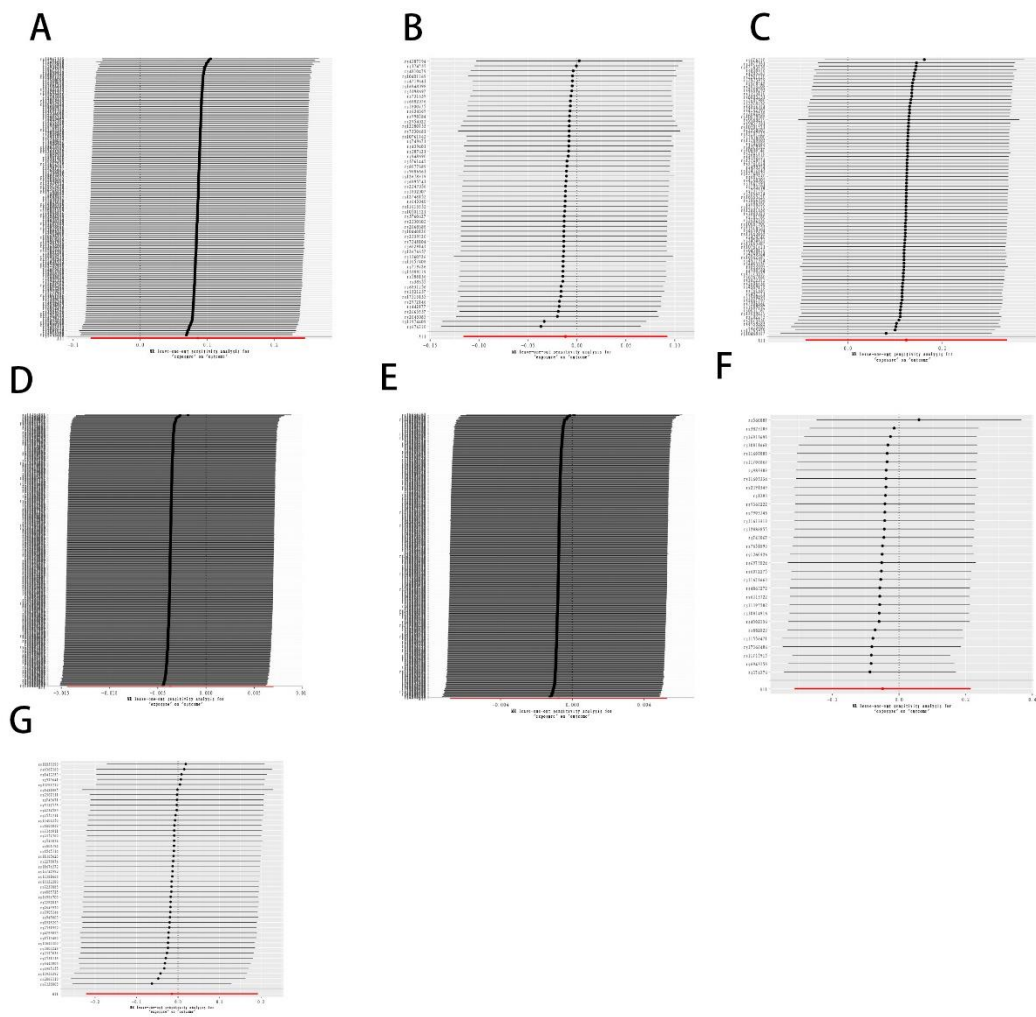

**Supplementary Figure 6. Leave-one-plot analysis of the metabolic syndrome and its components in relation to prostate cancer (outcome data from the FinnGen Consortium)**
